# Supplementary material for: Lack of adiponectin and adiponectin receptor 1 contributes to benign prostatic hyperplasia
Source: PubMed Central journal article supplement (PMC5687625; doi:10.18632/oncotarget.19877), 2017-08-03
Supplement: oncotarget-08-88537-s001.pdf [file oncotarget-08-88537-s001.pdf]

# Lack of adiponectin and adiponectin receptor 1 contributes to benign prostatic hyperplasia

## SUPPLEMENTARY MATERIALS

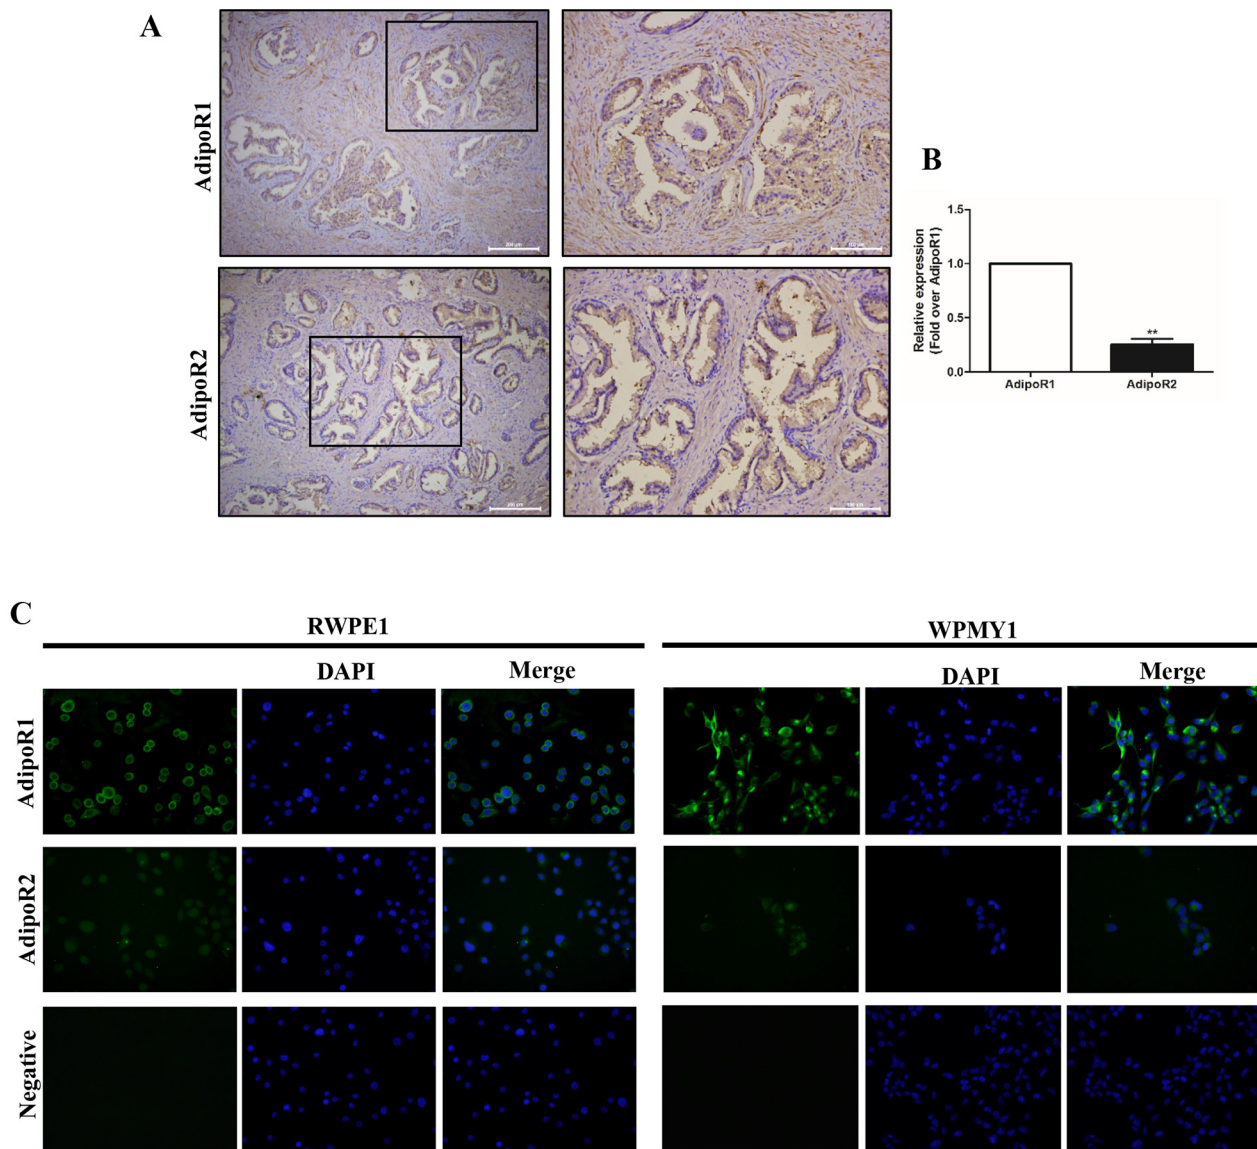

**Supplementary Figure 1: Expression of adiponectin receptors in prostatic tissues and cells.** (A) IHC staining for AdipoR1 and AdipoR2 on human postoperative BPH tissue samples. Scale bars, 100  $\mu$ m or 200  $\mu$ m. (B) Semi-quantitation based on the average of optical density (AOD) measured by Image J software (n=10, Student's t-test, \*\*p<0.01). (C) Immunofluorescence staining (green) for AdipoR1 and AdipoR2 in RWPE1 and WPMY1 cells, DAPI staining (blue) for nucleus. Magnification,  $\times$ 400.
